# Supplementary material for: Improving the quality of protein structure models by selecting from alignment alternatives
Source: PubMed Central journal article supplement (PMC1579234; doi:10.1186/1471-2105-7-364), 2006-07-27
Supplement: 1471-2105-7-364-S1.pdf [file 1471-2105-7-364-S1.pdf]

# Supplementary Material

## Improving the Quality of Protein Structure Models by Selecting from Alignment Alternatives

I. Sommer\*, S. Toppo, O. Sander, T. Lengauer, S.C.E. Tosatto

Email: sommer@mpi-sb.mpg.de;

\*Corresponding author

### All-Against-All Correlation

Table 1 lists the correlation coefficients of the FRST potentials *frst*, *rapdf*, *solu*, *hydb*, *tors* with the model quality scores *GDT*, *MS*, *TM*.

As a general trend, a moderate negative correlation can be observed between the FRST partial potentials and the quality measures. As was pointed out for the *frst* potential in the main manuscript, the correlation of the FRST partial potentials across all targets are not as relevant as their selection capabilities per target.

### Models with and without Loop Modeling

This study was performed for models with and models without loop modeling in parallel. The numbers in the main manuscript always refer to the models for which loop modeling was performed. Here, in the supplement we provide both.

In order to provide a fair comparison of the method proposed, although the Arby webserver does not provide loop modeling at the moment, we use default models with loop modeling performed for the analysis of the loop modeling case.

The overall tendency of the results remains the same, whether or not loop modeling is performed. The average difference in *TM*-score between a default model with loop modeling and a default model without loop modeling is 0.003.

Table 2 summarizes the results of model generation with and without loop modeling.

### Analysis per Target

In section 2.3.1 of the main manuscript, the selection of models according to the *frst* potential is evaluated. Analogously, the partial potentials *rapdf*, *solv*, *hydb*, and *tors* of the FRST method can be employed for model selection, by using these values instead of *frst* in the respective formulas. The results of this process are listed in Table 3.

### Percentage of Noticeably Improved Cases

We compute the average number of cases where the *TM* is improved more than 0.05 as

$$\underline{ci}_{E,q,e,>0.05} = \frac{1}{n \cdot ni} \sum_{t \in T} [qim_{E,q,e}(t) > 0.05]$$

or worsened more than -0.05 as

$$\underline{ci}_{E,q,e,<-0.05} = \frac{1}{n \cdot ni} \sum_{t \in T} [qim_{E,q,e}(t) < -0.05]$$

These numbers are also summarized in Table 3.

|              | <i>frst</i> | <i>rapdf</i> | <i>solv</i> | <i>hydb</i> | <i>tors</i> | <i>TM</i> | <i>MS</i> | <i>GDT</i> |
|--------------|-------------|--------------|-------------|-------------|-------------|-----------|-----------|------------|
| <i>frst</i>  | 1.00        | 0.02         | 0.73        | -0.34       | 0.95        | -0.43     | -0.50     | -0.52      |
| <i>rapdf</i> | 0.02        | 1.00         | 0.30        | 0.86        | -0.14       | -0.31     | -0.11     | -0.08      |
| <i>solv</i>  | 0.73        | 0.30         | 1.00        | 0.06        | 0.53        | -0.51     | -0.46     | -0.47      |
| <i>hydb</i>  | -0.34       | 0.86         | 0.06        | 1.00        | -0.40       | -0.15     | 0.10      | 0.13       |
| <i>tors</i>  | 0.95        | -0.14        | 0.53        | -0.40       | 1.00        | -0.33     | -0.43     | -0.44      |
| <i>TM</i>    | -0.43       | -0.31        | -0.51       | -0.15       | -0.33       | 1.00      | 0.93      | 0.93       |
| <i>MS</i>    | -0.50       | -0.11        | -0.46       | 0.10        | -0.43       | 0.93      | 1.00      | 0.99       |
| <i>GDT</i>   | -0.52       | -0.08        | -0.47       | 0.13        | -0.44       | 0.93      | 0.99      | 1.00       |

Table 1: Correlation coefficients between FRST potentials and quality scores *GDT*, *MS*, and *TM* across all models  $E(t)$ , for all targets  $t$  and models created with *PVS* and *PVH* joined.

| Model Generation Procedure      | $\overline{fr}_<$ | $\overline{fr}_>$ | $\overline{qir}$ | $\overline{fb}$ | $\overline{qib}$ |
|---------------------------------|-------------------|-------------------|------------------|-----------------|------------------|
| <i>PVS</i> , w/o loop modeling  | 0.37              | 0.21              | -0.013           | 0.45            | 0.018            |
| <i>PVH</i> , w/o loop modeling  | 0.54              | 0.23              | -0.032           | 0.56            | 0.023            |
| <i>PVS</i> , with loop modeling | 0.36              | 0.22              | -0.013           | 0.47            | 0.019            |
| <i>PVH</i> , with loop modeling | 0.51              | 0.26              | -0.031           | 0.59            | 0.026            |

Table 2: Description of the distributions of the *TM*-score quality behavior.  $\overline{fr}_<$  and  $\overline{fr}_>$  are the relative frequencies of models per target with a *TM*-score below and above Arby default, respectively.  $\overline{qir}$  is the improvement in *TM*-score when choosing models randomly.  $\overline{fb}$  is the relative frequency of targets for which a better model exists.  $\overline{qib}$  is the best theoretically possible improvement for the given ensemble of models.

| <i>PVS, all Measures for TM-score, no loop modeling performed</i> |                 |                     |                     |                     |                |                |                  |            |                           |                          |
|-------------------------------------------------------------------|-----------------|---------------------|---------------------|---------------------|----------------|----------------|------------------|------------|---------------------------|--------------------------|
| <i>e</i>                                                          | $\overline{ni}$ | $\overline{fm}_{<}$ | $\overline{fm}_{=}$ | $\overline{fm}_{>}$ | min <i>qim</i> | max <i>qim</i> | $\overline{qim}$ | <i>qim</i> | $\underline{ci}_{<-0.05}$ | $\underline{ci}_{>0.05}$ |
| <i>frst</i>                                                       | 0.52            | 0.25                | 0.49                | 0.26                | -0.54          | 0.24           | 0.0011           | 0.0021     | 0.101                     | 0.125                    |
| <i>rapdf</i>                                                      | 0.48            | 0.19                | 0.53                | 0.28                | -0.25          | 0.31           | 0.0068           | 0.0142     | 0.063                     | 0.174                    |
| <i>solv</i>                                                       | 0.53            | 0.25                | 0.48                | 0.27                | -0.44          | 0.27           | 0.0025           | 0.0047     | 0.096                     | 0.151                    |
| <i>hydb</i>                                                       | 0.45            | 0.31                | 0.55                | 0.14                | -0.46          | 0.25           | -0.0182          | -0.0404    | 0.356                     | 0.091                    |
| <i>tors</i>                                                       | 0.53            | 0.29                | 0.48                | 0.23                | -0.54          | 0.24           | -0.0053          | -0.0098    | 0.147                     | 0.094                    |
| SVM                                                               | 0.40            | 0.14                | 0.60                | 0.25                | -0.19          | 0.25           | 0.0069           | 0.0170     | 0.035                     | 0.164                    |
| <i>PVH, all Measures for TM-score, no loop modeling performed</i> |                 |                     |                     |                     |                |                |                  |            |                           |                          |
| <i>e</i>                                                          | $\overline{ni}$ | $\overline{fm}_{<}$ | $\overline{fm}_{=}$ | $\overline{fm}_{>}$ | min <i>qim</i> | max <i>qim</i> | $\overline{qim}$ | <i>qim</i> | $\underline{ci}_{<-0.05}$ | $\underline{ci}_{>0.05}$ |
| <i>frst</i>                                                       | 0.70            | 0.38                | 0.31                | 0.31                | -0.63          | 0.24           | -0.0032          | -0.0047    | 0.115                     | 0.096                    |
| <i>rapdf</i>                                                      | 0.62            | 0.27                | 0.39                | 0.34                | -0.30          | 0.32           | 0.0062           | 0.0100     | 0.068                     | 0.146                    |
| <i>solv</i>                                                       | 0.70            | 0.38                | 0.31                | 0.31                | -0.44          | 0.32           | -0.0019          | -0.0027    | 0.119                     | 0.103                    |
| <i>hydb</i>                                                       | 0.62            | 0.48                | 0.38                | 0.14                | -0.52          | 0.32           | -0.0603          | -0.0974    | 0.558                     | 0.073                    |
| <i>tors</i>                                                       | 0.70            | 0.42                | 0.30                | 0.27                | -0.64          | 0.24           | -0.0110          | -0.0157    | 0.165                     | 0.075                    |
| SVM                                                               | 0.55            | 0.22                | 0.45                | 0.32                | -0.23          | 0.32           | 0.0072           | 0.0130     | 0.045                     | 0.139                    |
| <i>PVS, all Measures for TM-score, loop modeling is performed</i> |                 |                     |                     |                     |                |                |                  |            |                           |                          |
| <i>e</i>                                                          | $\overline{ni}$ | $\overline{fm}_{<}$ | $\overline{fm}_{=}$ | $\overline{fm}_{>}$ | min <i>qim</i> | max <i>qim</i> | $\overline{qim}$ | <i>qim</i> | $\underline{ci}_{<-0.05}$ | $\underline{ci}_{>0.05}$ |
| <i>frst</i>                                                       | 0.51            | 0.23                | 0.50                | 0.27                | -0.51          | 0.35           | 0.00162          | 0.0031     | 0.105                     | 0.13                     |
| <i>rapdf</i>                                                      | 0.46            | 0.22                | 0.55                | 0.23                | -0.29          | 0.26           | 0.00054          | 0.0012     | 0.119                     | 0.14                     |
| <i>solv</i>                                                       | 0.51            | 0.24                | 0.50                | 0.26                | -0.39          | 0.35           | 0.00188          | 0.0037     | 0.108                     | 0.14                     |
| <i>hydb</i>                                                       | 0.51            | 0.31                | 0.49                | 0.20                | -0.44          | 0.35           | -0.01329         | -0.0258    | 0.281                     | 0.10                     |
| <i>tors</i>                                                       | 0.55            | 0.27                | 0.46                | 0.27                | -0.55          | 0.35           | -0.00171         | -0.0031    | 0.128                     | 0.12                     |
| SVM                                                               | 0.40            | 0.14                | 0.61                | 0.25                | -0.21          | 0.29           | 0.00638          | 0.0160     | 0.048                     | 0.16                     |
| <i>PVH, all Measures for TM-score, loop modeling is performed</i> |                 |                     |                     |                     |                |                |                  |            |                           |                          |
| <i>e</i>                                                          | $\overline{ni}$ | $\overline{fm}_{<}$ | $\overline{fm}_{=}$ | $\overline{fm}_{>}$ | min <i>qim</i> | max <i>qim</i> | $\overline{qim}$ | <i>qim</i> | $\underline{ci}_{<-0.05}$ | $\underline{ci}_{>0.05}$ |
| <i>frst</i>                                                       | 0.70            | 0.35                | 0.31                | 0.34                | -0.43          | 0.29           | 0.00047          | 0.00068    | 0.109                     | 0.118                    |
| <i>rapdf</i>                                                      | 0.59            | 0.30                | 0.42                | 0.28                | -0.35          | 0.35           | -0.00137         | -0.00233   | 0.140                     | 0.126                    |
| <i>solv</i>                                                       | 0.69            | 0.35                | 0.32                | 0.34                | -0.42          | 0.34           | -0.00014         | -0.00020   | 0.116                     | 0.133                    |
| <i>hydb</i>                                                       | 0.70            | 0.46                | 0.30                | 0.24                | -0.53          | 0.35           | -0.04492         | -0.06420   | 0.428                     | 0.095                    |
| <i>tors</i>                                                       | 0.72            | 0.39                | 0.28                | 0.33                | -0.64          | 0.29           | -0.00605         | -0.00836   | 0.152                     | 0.105                    |
| SVM                                                               | 0.58            | 0.22                | 0.43                | 0.35                | -0.27          | 0.35           | 0.00774          | 0.01339    | 0.052                     | 0.150                    |

Table 3: Description of distributions when selecting models according to the FRST potentials and the SVM.
